# Supplementary material for: Optimization of Cellulase Production by a Novel Endophytic Fungus Penicillium oxalicum R4 Isolated from Taxus cuspidata
Source: MDPI journal article supplement (doi:10.3390/su13116006), 2021-05-26

**Figure. S1.** Screening of fungal isolates for production of cellulases enzymes using Congo red assay (a) and Cellulase activity assay (b).

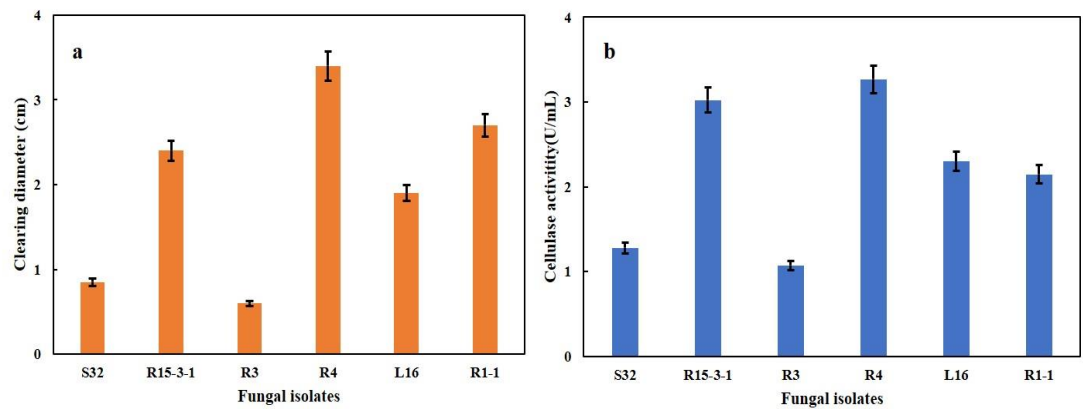

**Figure. S2.** Single factor optimization of cellulase activity of endophytic fungus R4 from *Taxus cuspidata*. Nitrogen source (a), pH (b), Temperature (c), Time (d).

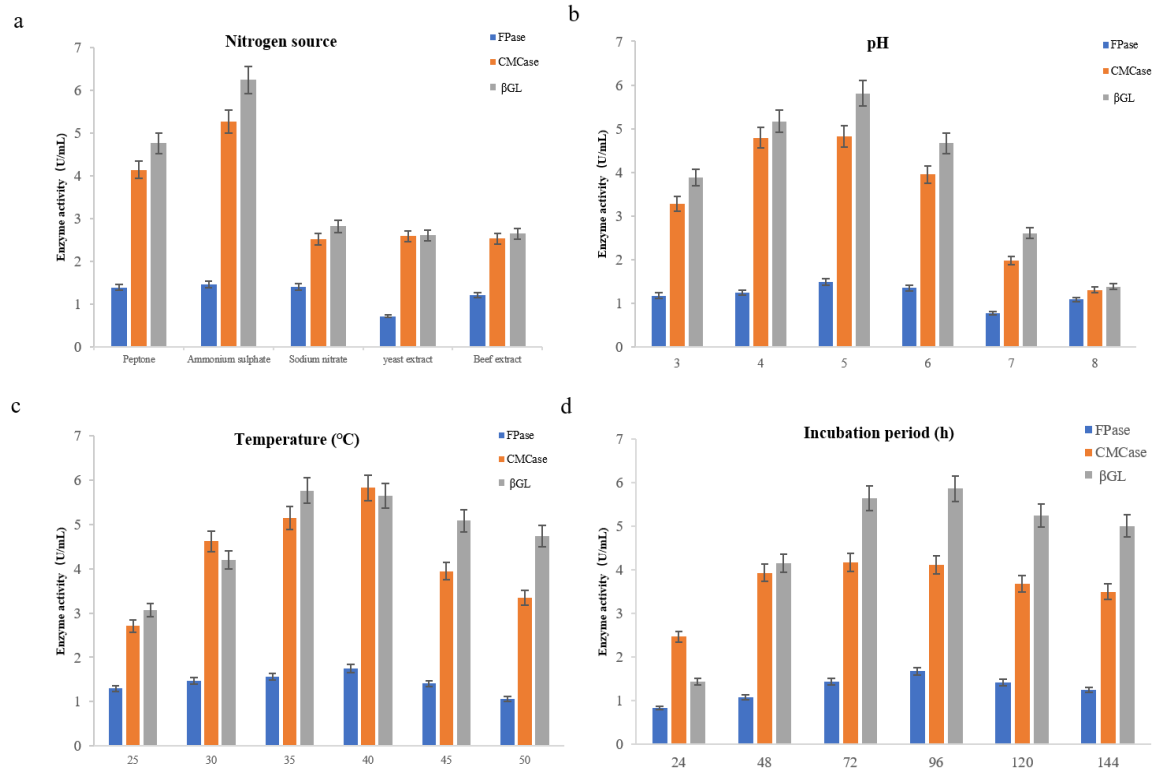

**Figure. S3.** Network training curves with Epochs number for trained subsets for cellulases yield.

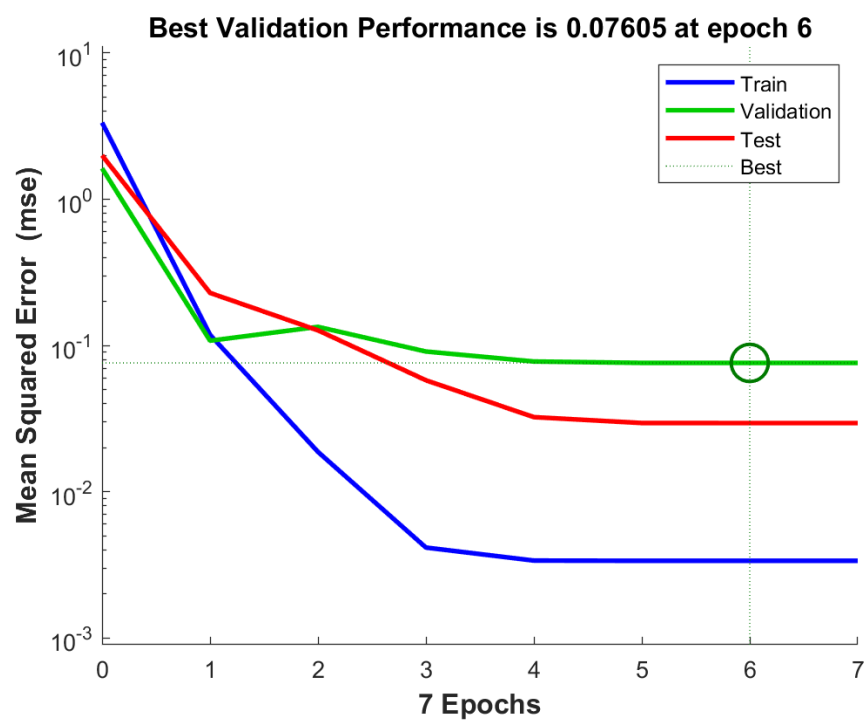

Supplement: s1 [file s1]
